# Supplementary material for: Ligand-Tuning of the Stability of Pd(II) Conjugates with Cyanocobalamin
Source: MDPI journal article supplement (doi:10.3390/ijms22157973), 2021-07-26
Supplement: s1 [file s1]

# Supplementary Materials

## Ligand-tuning of the stability of Pd(II) conjugates with cyanocobalamin

Dominika Porębska, Łukasz Orzeł, Dorota Rutkowska-Zbik, Grażyna Stochel and Rudi van Eldik

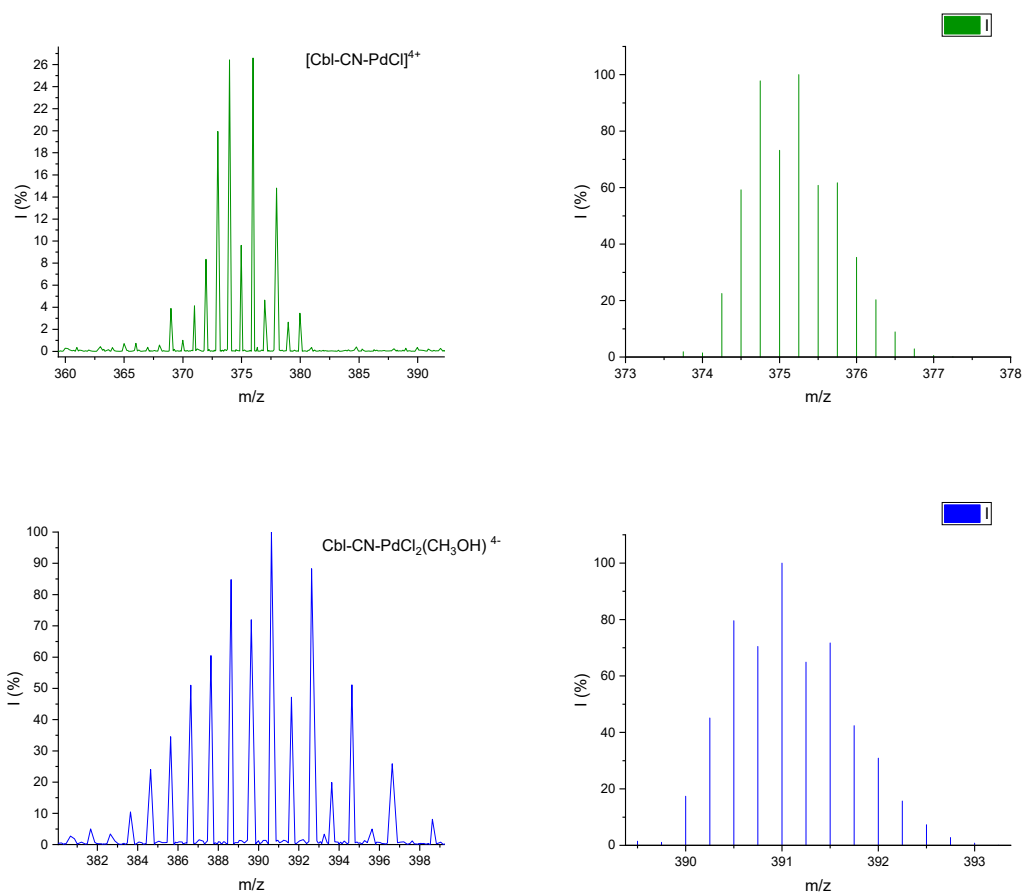

**Figure S1.** Mass spectra of **1** (green), **2** (blue) as (a) recorded by ESI-MS in post-reaction mixture (180 °C, 0.4 Bar, 4.0 l/min) and (b) simulated using *The Isotope Distribution Calculator*.

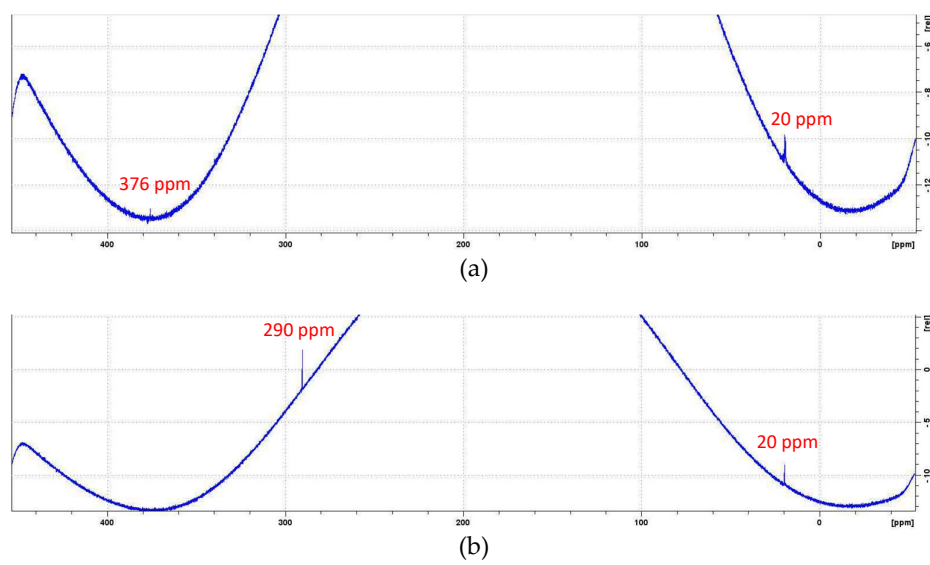

**Figure S2.** (a) The  $^{15}\text{N}$ -NMR spectrum of the reaction mixture containing **1**, (b) the  $^{15}\text{N}$ -NMR spectrum of CblCN.

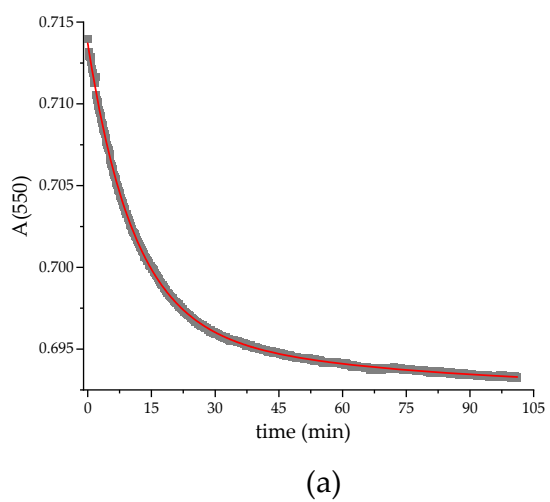

**Figure S3.** (a) The kinetic trace at 550 nm for the reaction of CblCN with  $[\text{Pd}(\text{dien})\text{H}_2\text{O}]^{2+}$  at 1:10 concentration ratio and (b) the plot of  $k_{\text{obs}}$  versus  $[\text{Pd}(\text{dien})\text{H}_2\text{O}]^{2+}$  concentration.  $[\text{CblCN}] = 1 \times 10^{-4} \text{ M}$ ,  $\text{pH} = 4.1$ ,  $T = 25^\circ\text{C}$ .
